# Supplementary material for: Stability Characterization of a Vaccine Antigen Based on the Respiratory Syncytial Virus Fusion Glycoprotein
Source: PubMed Central journal article supplement (PMC5072732; doi:10.1371/journal.pone.0164789), 2016-10-20
Supplement: pone.0164789.s001.pdf [file pone.0164789.s001.pdf]

**Heavy Chain Variable Region:**

QVHLQQSGAELVKPGASVKLSCKASGYTFTSYMYWVKQRPGQGLEWIGEIIPSMGSTNLNEKFKRKATL  
TADKSSSTAYMQLSSLTSEDSAVYYCIRGGYYGYWYFDVWGAGTTVTVSS

**Light Chain Variable Region:**

DIVLTQSPASLAVSLGQRATISCRASESVDNYGISFMNWFQQKPGQPPKLLIYAASNQGSVGPARGSGSGS  
TDFSLNIHPMEEDDTAMYFCQSKEVPRTFGGGTKLEIK
