# Supplementary material for: Stability Characterization of a Vaccine Antigen Based on the Respiratory Syncytial Virus Fusion Glycoprotein
Source: PubMed Central journal article supplement (PMC5072732; doi:10.1371/journal.pone.0164789), 2016-10-20

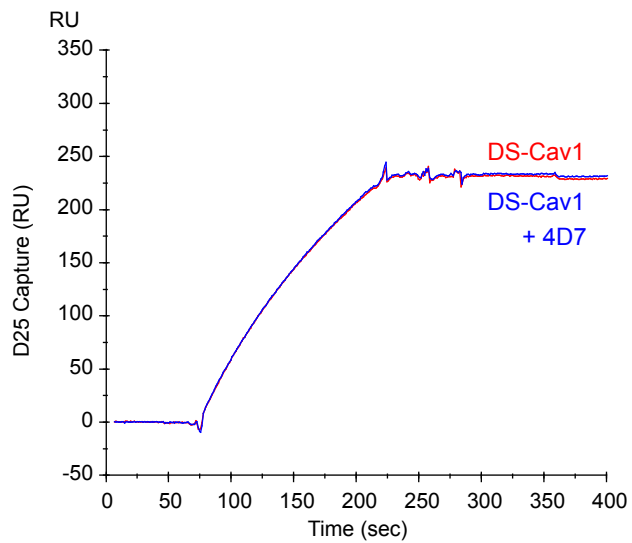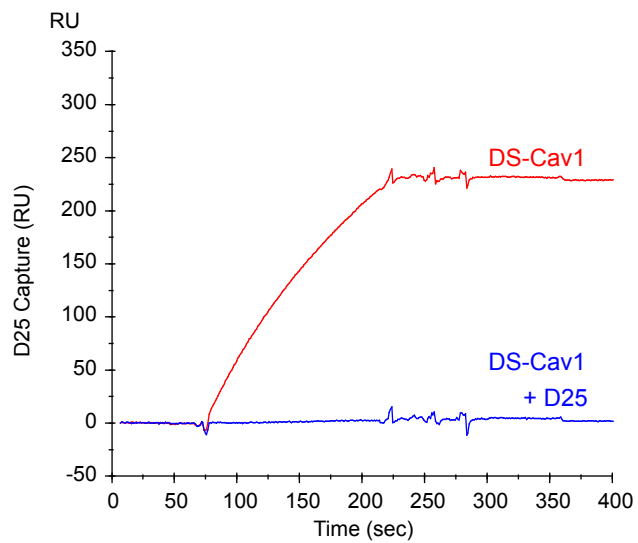

Supplement: pone.0164789.s002.pdf [file pone.0164789.s002.pdf]
